# Supplementary material for: Differences in college students’ occupational dysfunction and mental health considering trait and state anxiety during the COVID-19 pandemic
Source: PeerJ. 2022 May 19;10:e13443. doi: 10.7717/peerj.13443 (PMC9124458; doi:10.7717/peerj.13443)
Supplement: Data S1 [file peerj-10-13443-s001.xlsx]

## Sheet: Data
ID	age	Sex(Male:0,Female:1,Others:2)	occupational imbalance	occupational deprivation	occupational alienation	occupational marginalization	CAOD52pint =<1	CAOD total	GEN-HL 0-50	HC-HL 0-50	DP-HL 0-50	HP-HL 0-50	Health care Accessing	Health care Understanding	Health care Apprasing	Health care Applying	Disease Prevention Accessing	Disease Prevention Understanding	Disease Prevention Appraising	Disease Prevention Applying	Health Promotion Accessing	Health Promotion Understanding	Health Promotion Appraising	Health Promotion Applying	Weight	Heght	BMI	Y-1:P	Y-1:A	State anxiety	1: ≧42 0: <42	Y-2:P	Y-2:A	Trait anxiety	1: ≧45 0: <45	P	A	TMD score	A-H	C-B	D-D	F-I	T-A	V-A	F	Depression-Anxiety	Displeasure and anger	Lassitude	Total score
1	18	0	15	10	14	18	1	57	11.3475	13.5417	11.1111	9.375	10	4	10	5	8	3	10	4	8	5	6	6	60.8	165.3	22.2514	11	30	41	0	17	26	43	0	28	56	5	0	2	0	3	5	5	9	1	0	2	3
2	18	1	23	13	10	13	1	59	23.7037	22.9167	26.9231	21.875	11	9	12	6	8	2	15	9	12	8	8	9	68	150.8	29.9024	24	30	54	1	28	25	53	1	52	55	34	6	7	6	9	11	5	9	9	1	7	17
3	18	0	10	7	10	15	0	42	21.9858	26.0417	21.1111	18.75	11	10	12	8	8	5	14	7	11	7	6	10	49.5	161.7	18.9315	13	25	38	0	22	24	46	1	35	49	19	3	4	4	5	10	7	12	2	2	4	8
4	18	0	20	12	11	20	1	63	23.7589	30.2083	21.1111	19.7917	8	14	13	10	11	7	12	4	11	9	6	9	55.4	180.6	16.9853	16	26	42	1	23	24	47	1	39	50	23	5	5	6	9	7	9	9	7	7	8	22
5	18	1	24	10	12	15	1	61	21.2766	21.875	16.6667	25	9	9	13	6	8	4	13	5	12	8	8	12	52.4	154.3	22.009	14	13	27	0	28	22	50	1	42	35	12	5	5	3	8	4	13	10	3	4	9	16
6	19	1	7	4	8	8	0	27	15.9574	20.8333	13.3333	13.5417	8	8	11	9	6	5	12	4	8	5	6	10	50.9	161.1	19.6122	16	36	52	1	24	35	59	1	40	71	29	1	7	7	7	9	2	7	10	2	8	20
7	18	0	23	13	13	10	1	59	17.0213	19.7917	12.2222	18.75	11	9	9	6	9	3	10	4	11	8	7	8	62.3	180.1	19.207	14	28	42	1	15	26	41	0	29	54	9	1	2	1	4	8	7	9	2	2	3	7
8	18	1	25	14	14	15	1	68	26.087	37.5	22.2222	17.7778	13	16	14	9	9	4	14	8	6	10	7	8	54.6	158	21.8715	12	15	27	0	19	15	34	0	31	30	11	2	3	2	11	8	15	18	0	0	7	7
9	20	0	21	7	13	12	1	53	20.6522	20	16.6667	25	10	8	9	6	10	3	11	6	12	9	6	13	65.8	175.8	21.2906	18	32	50	1	21	29	50	1	39	61	32	1	1	12	11	9	2	2	12	1	7	20
10	18	0	7	4	9	6	0	26	15.2174	16.6667	16.6667	12.5	10	8	8	4	8	4	12	6	8	7	7	6	84.3	184.3	24.8186	11	23	34	0	15	30	45	1	26	53	-1	0	2	1	5	1	10	7	3	0	0	3
11	19	1	25	10	13	19	1	67	5.31915	8.33333	3.33333	4.16667	6	10	4	4	7	3	5	3	9	4	3	4	78.5	156.4	32.092	20	30	50	1	28	31	59	1	48	61	42	6	9	13	9	10	5	5	6	4	9	19
12	18	1	18	13	14	24	1	69	28.7234	29.1667	30	27.0833	11	11	12	10	9	9	15	9	11	11	8	12	52	162.1	19.7896	14	23	37	0	23	27	50	1	37	50	19	2	2	3	9	7	4	12	7	0	7	14
13	18	0	6	3	4	16	0	29	4.25532	7.29167	2.22222	3.125	6	5	7	5	6	3	5	3	7	4	3	5	65.2	168	23.1009	21	24	45	1	35	23	58	1	56	47	57	13	12	15	15	14	12	12	18	18	15	51
14	18	0	24	14	14	28	1	80	21.2766	21.875	20	21.875	10	8	9	10	8	8	11	6	12	8	6	11	49	168	17.3611	20	32	52	1	23	29	52	1	43	61	38	7	10	9	12	11	11	11	4	3	6	13
15	18	1	23	16	17	27	1	83	21.2766	19.7917	21.1111	22.9167	9	5	11	10	8	6	14	6	10	8	7	13	53.4	149.4	23.9243	21	23	44	1	31	23	54	1	52	46	21	3	6	2	6	10	6	8	7	3	8	18
16	18	1	25	15	19	33	1	92	15.9574	15.625	15.5556	16.6667	7	8	8	8	7	6	10	6	10	8	6	8	38.8	152.9	16.5965	37	38	75	1	40	35	75	1	77	73	56	4	11	13	13	15	0	3	18	10	15	43
17	18	0	20	8	14	16	1	58	25.5319	25	25.5556	26.0417	9	10	14	7	9	5	16	8	13	8	9	11	56	170.1	19.3544	22	23	45	1	32	23	55	1	54	46	39	2	12	8	12	12	7	11	6	2	11	19
18	18	0	10	5	6	12	0	33	29.7872	37.5	25.5556	26.0417	12	16	15	9	11	7	14	6	15	9	8	9	53.2	171.2	18.1511	14	30	44	1	21	26	47	1	35	56	20	5	5	4	5	7	6	8	6	6	7	19
19	18	1	9	9	16	14	0	48	25.4386	26.1905	26.6667	23.9583	0	2	12	4	11	6	13	9	13	9	6	11	48	161.7	18.3578	23	38	61	1	23	24	47	1	46	62	33	5	5	6	13	10	6	5	15	7	4	26
20	18	0	4	3	4	6	0	17	0.70922	2.08333	0	0	4	4	6	4	4	3	5	3	5	4	3	4	52.2	160.3	20.3144	10	17	27	0	23	27	50	1	33	44	2	0	1	0	2	6	7	10	0	0	3	3
21	18	0	12	10	11	11	0	44	30.1418	29.1667	32.2222	29.1667	12	10	12	10	9	8	16	11	13	11	9	11	55	168	19.487	19	20	39	0	26	23	49	1	45	43	24	6	9	4	9	9	13	12	3	2	6	11
22	20	0	9	8	21	30	1	68	22.8682	13.0952	23.3333	32.1429	5	8	8	4	8	3	16	9	9	8	9	15	79.5	164.9	29.2365	17	24	41	0	31	25	56	1	48	49	31	8	9	2	7	8	3	7	6	4	15	25
23	18	1	20	9	19	15	1	63	28.5185	24.4444	28.5714	32.2917	11	7	14	5	12	8	13	5	16	9	9	13	39.1	135.5	21.296	26	33	59	1	25	31	56	1	51	64	47	0	8	9	16	16	2	8	9	1	9	19
24	26	1	20	15	15	30	1	80	24.1135	25	23.3333	23.9583	9	11	10	10	11	6	11	8	14	10	7	8	58	158	23.2335	20	31	51	1	33	25	58	1	53	56	34	9	8	9	11	6	9	9	12	12	11	35
25	18	1	14	3	4	7	0	28	23.913	30	21.1111	20.8333	12	9	15	6	8	6	12	8	9	10	7	10	42	151.8	18.2266	20	22	42	1	22	24	46	1	42	46	13	5	4	5	5	6	12	7	9	7	5	21
26	18	0	7	4	3	6	0	20	28.4091	22.9167	29.4872	33.3333	14	9	11	4	13	3	17	3	17	7	8	13	52.2	172.2	17.6037	14	22	36	0	19	13	32	0	33	35	10	3	7	4	7	7	18	20	1	2	0	3
27	18	1	14	6	11	13	0	44	22.619	26.6667	18.1818	21.875	8	11	15	5	8	6	3	6	8	11	9	9	42	151.6	18.2747	21	31	52	1	26	27	53	1	47	58	57	15	12	15	15	15	15	15	6	6	6	18
28	20	1	13	8	7	11	0	39	20	15.4762	15.5556	28.125	8	6	8	5	6	3	9	11	6	11	10	16	42	146	19.7035	13	15	28	0	34	19	53	1	47	34	54	2	14	14	20	20	16	12	11	0	12	23
29	18	0	20	15	15	30	1	80	33.3333	33.3333	33.3333	33.3333	12	12	12	12	12	9	15	9	15	12	9	12	65.1	172	22.0051	40	10	50	1	40	10	50	1	80	20	57	15	12	15	15	15	15	15	18	18	18	54
30	18	1	23	9	14	15	1	61	34.3972	33.3333	35.5556	34.375	13	11	15	9	15	7	18	7	14	10	10	15	57.6	154.8	24.037	13	24	37	0	29	28	57	1	42	52	16	4	6	4	7	6	11	11	8	3	8	19
31	18	1	9	3	6	12	0	30	31.5217	31.25	30	33.3333	11	10	15	10	10	4	17	11	13	12	7	13	58.5	166.6	21.0769	17	14	31	0	30	20	50	1	47	34	48	8	10	16	18	10	14	10	11	8	14	33
32	18	1	25	14	13	29	1	81	21.6312	19.7917	23.3333	21.875	9	8	13	5	10	6	14	6	11	4	10	12	42.5	150.5	18.7636	23	29	52	1	32	23	55	1	55	52	43	6	16	7	17	17	20	19	13	12	12	37
33	18	1	9	3	10	6	0	28	1.77305	5.20833	0	0	8	5	4	4	4	3	5	3	5	4	3	4	43.8	147	20.2693	16	16	32	0	32	16	48	1	48	32	42	13	11	8	12	15	17	19	5	3	2	10
34	18	1	20	14	15	11	1	60	25.9259	21.875	25.5556	30.9524	12	8	11	6	8	7	15	8	13	10	11	6	51.5	157.2	20.8402	10	19	29	0	18	15	33	0	28	34	-1	0	3	1	7	5	17	18	1	0	0	1
35	18	1	20	6	8	12	0	46	14.8936	12.5	18.8889	13.5417	9	6	6	7	6	3	16	7	9	4	4	12	68	158	27.2392	18	23	41	0	29	29	58	1	47	52	32	4	7	8	10	10	7	8	10	4	11	25
36	18	1	26	16	19	31	1	92	6.02837	11.4583	1.11111	5.20833	9	5	7	6	5	3	5	3	5	6	4	6	50	150	22.2222	23	31	54	1	27	25	52	1	50	56	28	5	5	8	10	7	7	7	12	4	14	30
37	18	1	18	17	20	19	1	74	24.4681	26.0417	17.7778	29.1667	12	10	12	7	10	3	13	5	14	9	9	12	43.5	160.2	16.9498	33	40	73	1	39	39	78	1	72	79	73	2	15	20	19	17	0	1	18	9	16	43
38	19	1	20	18	19	19	1	76	28.2946	25	23.3333	35.4167	11	4	7	8	11	5	14	6	17	9	9	15	51	161	19.6752	24	33	57	1	33	32	65	1	57	65	61	5	11	17	17	11	0	5	17	8	14	39
39	18	1	19	15	9	12	1	55	26.2411	25	26.6667	27.0833	16	9	10	5	8	6	18	7	11	11	9	11	51	165.4	18.6423	18	20	38	0	22	24	46	1	40	44	22	0	7	5	8	12	10	13	3	2	7	12
40	18	1	23	6	13	13	1	55	19.5035	22.9167	14.4444	20.8333	9	10	13	6	6	4	11	7	9	9	8	10	58.5	167.1	20.9509	22	25	47	1	29	27	56	1	51	52	30	1	7	9	12	11	10	14	7	3	11	21
41	18	1	24	14	9	20	1	67	27.6596	26.0417	25.5556	31.25	12	10	12	7	13	4	13	8	13	11	9	13	60.6	160.2	23.6128	28	35	63	1	33	33	66	1	61	68	44	5	7	9	12	11	0	4	15	4	14	33
42	18	1	25	16	18	25	1	84	30.1418	23.9583	31.1111	35.4167	9	9	12	9	14	7	14	8	13	14	10	13	50.2	161.2	19.3185	20	38	58	1	24	27	51	1	44	65	40	10	8	10	13	8	9	10	6	6	6	18
43	18	1	25	13	14	18	1	70	24.8227	21.875	25.5556	27.0833	12	8	11	6	12	6	14	6	13	9	8	12	49	165.3	17.9329	19	34	53	1	21	28	49	1	40	62	34	0	7	5	12	15	5	11	9	1	5	15
44	18	1	28	13	13	25	1	79	21.6312	18.75	20	26.0417	9	8	11	6	7	5	15	6	10	11	10	10	50.2	159.3	19.7821	24	38	62	1	37	24	61	1	61	62	51	5	8	7	14	20	3	15	18	9	6	33
45	18	1	4	3	3	6	0	16	7.80142	10.4167	1.11111	11.4583	8	6	8	4	4	3	6	3	5	5	8	9	49.5	150.4	21.8831	14	19	33	0	19	15	34	0	33	34	17	10	2	7	8	3	13	13	7	4	3	14
46	18	1	11	6	6	15	0	38	30.4965	26.0417	33.3333	32.2917	11	10	10	10	12	8	15	10	14	12	9	12	46.7	163.7	17.4269	20	27	47	1	26	25	51	1	46	52	25	1	6	2	11	15	10	10	7	0	9	16
47	18	1	12	9	13	7	0	41	8.86525	11.4583	5.55556	9.375	8	4	10	5	4	3	7	6	8	4	3	10	51.2	160	20	17	23	40	0	29	19	48	1	46	42	46	13	10	9	12	13	11	11	6	11	5	22
48	18	1	19	11	13	14	1	57	17.9487	17.7778	16.6667	19.697	8	9	8	6	8	6	6	6	4	8	2	10	49.8	159.6	19.5508	13	29	42	1	24	28	52	1	37	57	21	1	5	4	8	9	6	10	8	0	7	15
49	22	0	14	9	14	18	1	55	34.3972	32.2917	33.3333	37.5	14	10	13	10	13	7	16	9	15	11	12	14	59.6	179.8	18.436	14	37	51	1	20	29	49	1	34	66	39	2	6	17	13	5	4	8	11	0	10	21
50	22	0	20	3	6	13	0	42	10.3704	14.2857	5.55556	11.4583	7	4	8	7	4	3	7	6	9	6	3	9	50.3	167.7	17.8855	23	13	36	0	25	24	49	1	48	37	15	0	2	5	6	10	8	20	6	4	8	18
51	22	0	17	11	12	21	1	61	9.92908	14.5833	2.22222	12.5	9	7	8	6	5	3	6	3	5	9	4	10	54.5	172.5	18.3155	14	28	42	1	22	26	48	1	36	54	19	5	4	4	5	6	5	10	7	7	7	21
52	23	1	8	7	7	24	0	46	23.1884	18.8889	24.4444	26.0417	9	8	9	6	12	6	13	6	14	8	9	10	45	162.9	16.9578	18	34	52	1	26	24	50	1	44	58	13	0	5	4	4	5	5	5	9	0	12	21
53	20	0	9	6	12	13	0	40	20.4167	20.8333	15.2778	23.9583	8	9	6	4	8	6	3	6	11	8	6	14	67	179.5	20.7944	15	25	40	0	18	27	45	1	33	52	4	0	4	2	4	4	10	10	1	2	5	8
54	20	0	7	5	12	16	0	40	20.922	16.6667	18.8889	27.0833	9	5	11	7	9	3	13	7	11	9	8	14	49.5	169.2	17.2904	15	23	38	0	28	26	54	1	43	49	31	2	8	10	10	10	9	13	10	3	10	23
55	18	0	14	10	10	20	1	54	25.5319	29.1667	25.5556	21.875	13	9	14	8	14	8	10	6	10	8	8	11	48.9	170	16.9204	12	18	30	0	35	24	59	1	47	42	8	0	4	3	6	3	8	8	2	0	0	2
56	18	0	10	7	16	9	0	42	17.3913	19.7917	12.2222	20	9	9	11	6	6	4	13	3	6	5	9	13	57.5	169.7	19.9666	28	35	63	1	37	31	68	1	65	66	55	3	10	16	16	16	6	5	14	6	10	30
57	19	0	12	3	21	6	0	42	4.60993	5.20833	1.11111	7.29167	5	5	5	6	4	3	5	4	9	5	3	6	63.3	165.3	23.1664	21	24	45	1	22	27	49	1	43	51	23	2	3	2	10	7	1	3	9	1	5	15
58	19	0	28	20	20	33	1	101	21.9858	20.8333	26.6667	18.75	11	9	8	8	11	9	13	6	10	8	6	10	45.5	160.1	17.7512	14	19	33	0	11	18	29	0	25	37	0	10	0	2	0	2	14	6	15	7	16	38
59	18	0	11	3	16	14	0	44	8.86525	5.20833	7.77778	13.5417	6	4	7	4	8	3	8	3	9	5	5	10	62.2	173.8	20.5916	25	31	56	1	33	28	61	1	58	59	28	5	1	5	10	9	2	10	7	8	9	24
60	18	0	23	12	16	17	1	68	31.1594	25	32.2222	36.6667	13	9	12	6	14	3	17	10	12	12	10	14	61.2	171.1	20.9051	21	29	50	1	31	24	55	1	52	53	61	6	14	13	11	18	1	5	13	8	16	37
61	18	0	27	14	17	18	1	76	11.2319	11.1111	11.1111	11.4583	4	4	8	9	8	3	8	6	6	6	8	7	64.5	159	25.5132	24	27	51	1	33	23	56	1	57	50	32	1	9	4	14	18	14	18	4	0	4	8
62	18	0	13	9	19	6	0	47	27.5362	22.9167	28.8889	31.1111	13	9	12	4	11	3	16	11	13	14	8	8	72	172	24.3375	24	16	40	0	24	17	41	0	48	33	8	0	4	2	3	2	3	2	2	0	1	3
63	18	0	17	4	14	10	0	45	12.0567	10.4167	14.4444	11.4583	9	5	8	4	5	3	12	8	8	9	3	7	52.3	171.2	17.8441	12	28	40	0	22	24	46	1	34	52	4	2	5	0	0	2	5	7	0	0	3	3
64	19	0	4	3	14	6	0	27	3.40909	10.2564	1.11111	0	6	7	2	6	5	3	5	3	5	4	3	4	64.5	174.6	21.1578	11	16	27	0	13	12	25	0	24	28	3	0	1	0	6	1	5	12	0	0	0	0
65	18	0	18	16	19	16	1	69	14.8936	8.33333	22.2222	14.5833	8	4	7	5	14	3	12	6	10	6	5	9	48.5	172.4	16.318	11	24	35	0	27	27	54	1	38	51	10	1	4	3	8	5	11	13	7	1	8	16
66	18	0	13	3	3	10	0	29	28.4091	18.8889	30	36.9048	10	5	11	6	13	6	17	6	15	8	9	13	68.5	173.2	22.8347	18	14	32	0	14	18	32	0	32	32	-9	0	1	0	0	1	11	10	0	1	2	3
67	18	0	17	10	5	15	0	47	13.7681	11.4583	11.1111	18.8889	10	7	6	4	10	4	6	5	8	9	8	7	98.2	180.2	30.2414	16	31	47	1	26	21	47	1	42	52	9	2	3	0	8	6	10	11	5	1	0	6
68	19	0	7	4	6	9	0	26	26.5957	21.875	26.6667	31.25	10	10	10	7	10	3	15	11	11	10	9	16	49	175.5	15.909	16	24	40	0	18	27	45	1	34	51	10	3	3	6	0	2	4	3	3	6	11	20
69	29	0	19	17	18	23	1	77	28.3688	22.9167	34.4444	28.125	8	8	12	10	10	8	18	10	13	8	8	14	85	177	27.1314	22	38	60	1	26	34	60	1	48	72	20	3	4	5	3	7	2	7	6	1	9	16
70	18	0	26	4	16	7	1	53	26.2411	26.0417	27.7778	25	10	13	12	6	13	7	16	4	13	9	7	11	78.4	175.4	25.4834	28	29	57	1	28	27	55	1	56	56	37	6	6	8	12	9	4	10	7	7	10	24
71	18	0	20	14	19	30	1	83	27.6423	22.7273	27.7778	31.1111	5	7	7	7	12	6	13	9	12	12	8	11	62	174	20.4783	21	39	60	1	27	35	62	1	48	74	76	15	12	17	18	17	3	6	5	8	5	18
72	18	0	17	9	10	13	0	49	29.7872	28.125	24.4444	36.4583	12	8	11	12	13	5	14	5	15	13	9	14	50.7	170.8	17.3793	16	33	49	1	30	31	61	1	46	64	29	4	4	6	9	8	2	3	7	6	15	28
73	18	1	14	4	7	10	0	35	8.33333	9.375	5.55556	10	8	5	8	4	6	3	7	4	4	7	5	8	68	173	22.7204	15	20	35	0	35	28	63	1	50	48	2	0	0	1	6	4	9	13	0	0	0	0
74	18	0	18	11	9	12	0	50	25.3623	24.4444	25.5556	26.0417	7	9	13	8	9	6	15	8	12	10	9	10	56.5	175.5	18.344	12	25	37	0	23	25	48	1	35	50	8	0	1	4	5	3	5	7	3	4	5	12
75	18	0	18	10	10	14	1	52	20.922	22.9167	15.5556	23.9583	12	7	12	7	9	3	12	5	13	9	7	10	70.8	171.5	24.0716	14	37	51	1	22	32	54	1	36	69	20	2	4	2	7	8	3	6	1	0	1	2
76	18	0	20	7	12	11	0	50	32.9787	29.1667	31.1111	38.5417	12	9	15	8	13	5	17	8	16	14	9	14	46.5	170	16.09	10	33	43	1	16	28	44	0	26	61	8	1	1	3	8	0	5	9	0	0	6	6
77	18	0	22	8	9	21	1	60	32.906	38.0952	26.9231	33.3333	14	16	6	10	10	6	12	6	14	8	6	8	42	158.5	16.7182	22	31	53	1	29	28	57	1	51	59	25	0	7	8	9	12	11	12	9	0	10	19
78	18	0	6	3	3	6	0	18	0	0	0	0	4	4	4	4	4	3	5	3	5	4	3	4	57.4	175.1	18.7215	40	10	50	1	27	11	38	0	67	21	57	15	12	15	15	15	15	15	12	12	12	36
79	18	0	25	19	21	35	1	100	18.7943	18.75	8.88889	28.125	9	8	10	7	5	3	10	5	12	10	8	13	56.5	179	17.6337	35	38	73	1	38	39	77	1	73	77	62	0	13	19	11	19	0	11	17	6	15	38
80	18	0	25	10	10	20	1	65	21.4815	26.6667	20	17.7778	12	8	10	9	13	5	9	6	11	7	8	5	61.2	179.9	18.9099	32	33	65	1	35	27	62	1	67	60	51	6	11	9	17	16	8	14	12	9	11	32
81	19	0	5	5	11	7	0	28	31.2057	32.2917	27.7778	33.3333	8	11	15	13	10	4	15	11	15	9	8	16	58.2	167.5	20.744	18	35	53	1	30	37	67	1	48	72	40	3	5	7	10	16	1	6	4	1	10	15
82	19	1	18	16	14	23	1	71	28.8618	33.3333	29.4872	23.8095	12	11	8	11	12	6	9	9	10	8	8	8	43.7	157.1	17.7064	24	25	49	1	24	24	48	1	48	49	24	5	8	3	8	13	13	13	8	7	5	20
83	19	0	8	16	16	12	1	52	15.1163	15.5556	10.2564	18.8889	10	6	9	4	6	4	6	5	6	8	7	11	76.8	174	25.3666	18	32	50	1	25	32	57	1	43	64	24	2	7	8	8	7	8	1	4	1	7	12
84	18	0	21	5	18	19	1	63	22.8261	27.7778	20	20.8333	11	6	13	10	11	4	13	5	10	9	5	12	61.2	175.3	19.9153	14	31	45	1	33	26	59	1	47	57	28	3	6	9	8	7	5	4	10	12	12	34
85	19	1	14	12	18	13	1	57	7.44681	5.20833	12.2222	5.20833	7	4	6	4	6	3	9	8	6	4	6	5	46.6	155.5	19.2719	24	34	58	1	36	30	66	1	60	64	54	2	8	15	15	18	4	16	10	3	11	24
86	18	0	19	3	9	7	0	38	22.3404	22.9167	22.2222	21.875	9	7	14	8	9	4	14	8	12	8	7	10	59.8	161.2	23.0129	22	19	41	0	25	15	40	0	47	34	19	0	7	4	9	12	13	13	7	1	10	18
87	18	0	23	15	15	29	1	82	27.5362	29.1667	30.9524	22.9167	10	9	14	11	11	6	17	6	13	8	6	11	50.3	165.3	18.4087	27	23	50	1	24	26	50	1	51	49	21	4	4	2	10	9	8	7	4	4	4	12
88	18	1	9	6	7	11	0	33	26.087	30.2083	21.1111	26.6667	10	10	15	10	11	4	13	6	11	9	8	11	50.2	160.2	19.5604	11	24	35	0	15	25	40	0	26	49	-2	0	2	0	2	6	12	12	2	0	2	4
89	18	0	6	3	13	9	0	31	9.92908	9.375	2.22222	17.7083	6	4	10	5	4	3	7	3	10	4	7	12	56.6	170	19.5848	27	31	58	1	31	29	60	1	58	60	43	7	8	13	9	11	5	8	9	4	10	23
90	18	0	27	20	17	18	1	82	2.59259	7.14286	1.11111	0	4	5	6	5	4	3	6	3	5	4	3	4	52.4	177.4	16.6504	16	36	52	1	24	31	55	1	40	67	52	4	9	10	18	18	7	10	13	6	5	24
91	18	0	19	6	9	10	0	44	20.155	12.8205	22.2222	24.4444	10	7	3	3	10	4	13	8	8	10	5	14	55.2	168	19.5578	16	24	40	0	26	20	46	1	42	44	34	7	10	8	10	13	14	11	2	4	5	11
92	19	1	5	7	13	12	0	37	26.7544	29.1667	17.9487	33.3333	11	8	8	6	8	3	8	8	11	11	2	15	51.7	160.1	20.1701	18	22	40	0	34	24	58	1	52	46	28	0	8	7	7	11	5	8	9	0	11	20
93	18	1	24	16	14	24	1	78	25.9259	29.1667	24.4444	23.8095	14	10	10	10	10	6	13	8	9	6	6	13	53.6	173.8	17.7446	38	39	77	1	40	36	76	1	78	75	62	10	10	15	16	15	4	5	15	12	15	42
94	19	0	12	8	8	14	0	42	13.1206	16.6667	10	12.5	8	7	12	5	8	3	8	5	11	4	7	6	92.8	174.8	30.3714	11	10	21	0	30	18	48	1	41	28	1	0	5	4	5	1	14	11	0	0	4	4
95	18	0	19	7	13	13	1	52	30.8511	28.125	31.1111	33.3333	12	9	12	10	12	7	15	9	15	10	8	15	50.1	161.1	19.304	12	25	37	0	15	23	38	0	27	48	10	0	2	0	12	1	5	6	0	0	5	5
96	18	0	16	8	8	14	0	46	25.1852	26.1905	25.5556	23.9583	4	10	11	11	11	7	12	8	12	9	8	10	74	175	24.1633	21	22	43	1	25	26	51	1	46	48	20	1	4	7	12	13	17	15	3	0	6	9
97	18	0	28	16	18	31	1	93	6.73759	11.4583	0	8.33333	10	7	5	5	4	3	5	3	5	6	7	6	57	173.4	18.9573	23	17	40	0	24	29	53	1	47	46	26	8	4	4	8	8	6	7	6	8	10	24
98	18	0	16	5	11	15	0	47	25.969	25	19.0476	33.3333	12	3	12	8	8	3	14	5	11	9	10	15	61.8	172	20.8897	14	27	41	0	23	27	50	1	37	54	14	1	6	0	5	9	7	5	1	1	6	8
99	19	0	18	9	13	16	1	56	46.1538	42.3077	50	46.875	3	14	13	16	12	0	20	8	20	13	12	16	80.2	175.1	26.1579	13	30	43	1	19	20	39	0	32	50	13	3	4	5	6	5	10	11	0	0	0	0
100	18	0	17	3	14	12	0	46	12.0567	17.7083	8.88889	9.375	11	7	10	5	6	3	11	3	5	8	4	8	49.7	169.7	17.2581	16	23	39	0	27	26	53	1	43	49	33	7	8	5	8	10	5	7	7	4	10	21
101	18	0	19	9	14	23	1	65	23.0496	22.9167	22.2222	23.9583	9	9	11	9	8	6	13	8	13	9	8	9	49	165.5	17.8896	29	38	67	1	39	25	64	1	68	63	57	7	11	18	11	17	7	9	14	6	10	30
102	19	0	20	13	17	30	1	80	22.695	26.0417	22.2222	19.7917	13	12	10	6	6	7	13	9	9	9	7	10	70.8	181.3	21.5396	20	17	37	0	20	20	40	0	40	37	18	5	7	6	6	5	11	9	5	4	10	19
103	18	0	14	11	14	24	1	63	14.8936	16.6667	13.3333	14.5833	9	5	11	7	6	6	9	6	10	7	5	8	61.2	168	21.6837	15	34	49	1	26	31	57	1	41	65	32	6	5	9	5	11	4	9	7	2	6	15
104	18	0	19	15	15	21	1	70	16.6667	22.9167	10	16.6667	11	12	10	5	10	4	7	3	10	8	6	8	83	172	28.0557	23	25	48	1	28	26	54	1	51	51	39	10	8	10	9	8	6	3	10	12	12	34
105	20	0	11	10	17	15	1	53	26.5957	18.75	23.3333	37.5	9	7	12	6	12	4	13	7	13	12	11	16	56	167.5	19.9599	19	29	48	1	28	28	56	1	47	57	32	11	3	8	5	8	3	7	8	9	10	27
106	18	0	28	17	16	21	1	82	23.7589	23.9583	20	27.0833	9	10	11	9	11	3	13	6	13	10	6	13	52.1	159.6	20.4537	19	31	50	1	31	24	55	1	50	55	28	2	6	12	6	9	7	13	10	1	14	25
107	18	0	8	14	17	15	1	54	21.3178	14.5833	22.7273	27.0833	9	7	8	6	2	4	11	9	13	9	5	15	55	169.4	19.1662	24	26	50	1	26	30	56	1	50	56	25	0	5	7	5	11	3	6	7	1	9	17
108	18	0	7	6	3	6	0	22	0	0	0	0	3	4	1	3	4	3	5	3	5	4	3	4	60	182.6	17.9949	11	25	36	0	12	20	32	0	23	45	-6	0	1	0	3	3	13	6	0	0	0	0
109	18	0	19	17	17	33	1	86	28.0142	31.25	30	22.9167	12	12	11	11	13	9	13	7	10	12	7	9	69.4	174	22.9224	22	26	48	1	31	18	49	1	53	44	37	7	4	15	11	5	5	8	6	12	7	25
110	18	0	22	14	16	24	1	76	23.4043	21.875	22.2222	26.0417	11	10	8	8	10	6	13	6	13	9	8	11	75	169.6	26.0741	12	12	24	0	15	14	29	0	27	26	9	2	3	2	3	5	6	7	6	6	6	18
111	18	0	18	10	14	19	1	61	8.86525	12.5	6.66667	7.29167	8	7	8	5	8	3	7	3	9	4	3	7	82.5	174.9	26.9696	20	30	50	1	25	29	54	1	45	59	36	6	6	7	12	10	5	11	9	6	9	24
112	19	0	13	4	8	14	0	39	16.6667	14.5833	16.6667	18.75	8	5	10	7	10	4	11	5	9	8	3	14	62.7	166.2	22.6989	25	29	54	1	24	29	53	1	49	58	20	2	5	2	5	10	4	9	4	2	4	10
113	20	0	20	21	18	14	1	73	11.7021	9.375	7.77778	17.7083	6	4	10	5	5	3	9	5	10	5	7	11	62.5	177.7	19.7927	27	39	66	1	33	31	64	1	60	70	57	3	12	13	14	17	2	10	14	5	11	30
114	18	0	14	4	6	10	0	34	14.539	17.7083	15.5556	10.4167	8	7	11	7	7	6	8	8	7	8	5	6	76.2	172.8	25.5192	24	16	40	0	25	21	46	1	49	37	24	5	8	7	13	6	15	16	9	6	11	26
115	18	0	8	3	11	10	0	32	20.5426	25.5556	13.0952	22.619	10	11	10	7	5	4	9	7	12	6	8	7	64.5	165.6	23.5201	11	32	43	1	13	31	44	0	24	63	4	1	0	1	3	1	2	6	0	0	0	0
116	18	0	21	11	14	6	1	52	2.83688	4.16667	4.44444	0	6	4	6	4	4	3	7	5	5	4	3	4	58	160.9	22.4035	13	34	47	1	16	32	48	1	29	66	15	0	3	3	8	6	5	9	2	0	5	7
117	18	0	10	8	8	17	0	43	17.3759	25	10	16.6667	11	11	11	7	6	3	12	3	9	7	8	8	60	170.9	20.5432	17	21	38	0	17	23	40	0	34	44	11	0	3	4	3	7	6	8	3	0	3	6
118	18	0	10	8	15	12	0	45	17.8571	17.8571	15.5556	20.5128	5	6	9	9	8	3	14	4	4	7	4	14	47.6	167.5	16.9659	15	24	39	0	24	22	46	1	39	46	12	5	4	2	4	3	6	6	2	0	2	4
119	18	0	13	8	8	17	0	46	26.087	23.9583	21.1111	33.3333	13	9	10	7	9	7	12	6	12	12	9	12	58.2	169.3	20.3053	12	26	38	0	23	24	47	1	35	50	23	2	6	6	6	9	6	10	5	0	4	9
120	18	0	25	21	20	31	1	97	5.7971	8.88889	4.44444	4.16667	9	5	4	5	7	4	5	3	6	4	3	7	67.5	186.5	19.4065	12	29	41	0	23	30	53	1	35	59	36	9	7	11	13	8	12	14	15	14	14	43
121	18	0	25	6	15	24	1	70	35.1449	36.4583	34.4444	34.4444	12	15	16	8	14	8	16	8	15	12	6	13	53.5	171.5	18.1897	16	28	44	1	28	27	55	1	44	55	48	7	11	12	12	10	4	10	8	6	12	26
122	18	0	11	14	9	14	0	48	17.037	13.0952	15.5556	21.875	8	4	7	6	6	3	12	8	14	10	6	7	58.8	168.8	20.6363	14	20	34	0	19	25	44	0	33	45	-1	2	0	0	6	4	13	15	1	3	1	5
123	18	0	14	6	8	10	0	38	25	23.9583	26.6667	24.4444	11	8	12	8	11	5	15	8	10	9	6	12	64.5	166.5	23.2665	14	26	40	0	25	23	48	1	39	49	21	2	7	3	10	10	11	11	3	2	4	9
124	22	0	26	17	19	33	1	95	22.695	29.1667	28.8889	10.4167	13	8	8	15	12	9	12	8	8	8	4	6	75	170	25.9516	25	36	61	1	31	31	62	1	56	67	57	6	11	12	15	17	4	11	14	8	12	34
125	21	0	20	15	18	31	1	84	14.8551	11.4583	10	23.3333	7	10	5	5	5	4	9	6	14	11	4	7	63	132	36.157	14	21	35	0	30	30	60	1	44	51	38	6	7	7	14	9	5	14	0	0	1	1
126	22	1	20	13	17	17	1	67	32.1429	29.7619	32.1429	34.5238	12	12	7	8	11	4	15	11	8	11	12	12	52	162.5	19.6923	21	37	58	1	25	38	63	1	46	75	35	6	8	5	11	12	7	8	14	2	13	29
127	21	0	20	10	13	14	1	57	30.2326	33.3333	30	28.125	5	10	10	11	10	9	16	7	12	9	10	12	50.2	166.5	18.1082	15	26	41	0	26	30	56	1	41	56	40	5	9	8	11	12	5	11	8	4	8	20
128	19	0	14	11	15	16	1	56	23.0496	13.5417	25.5556	30.2083	9	6	8	6	14	5	14	5	17	7	6	15	77.2	163.9	28.7382	23	32	55	1	28	26	54	1	51	58	28	0	5	9	10	10	6	10	9	2	11	22
129	18	0	26	13	11	9	1	59	24.4681	26.0417	22.2222	25	13	10	12	6	10	5	13	7	13	10	9	8	53.8	167.9	19.0845	16	15	31	0	19	22	41	0	35	37	15	2	8	7	7	11	20	15	2	1	3	6
130	18	0	18	11	13	25	1	67	14.4444	15.5556	14.2857	13.5417	12	5	9	3	7	3	9	7	9	7	5	8	55.9	174.6	18.3368	26	23	49	1	34	27	61	1	60	50	51	9	13	12	15	16	14	8	9	10	9	28
131	18	0	18	10	13	11	1	52	19.9187	17.9487	17.8571	23.8095	8	7	5	7	8	5	10	6	11	9	2	12	64.5	168	22.8529	17	31	48	1	23	33	56	1	40	64	32	2	7	7	7	12	3	6	7	0	9	16
132	18	0	26	17	13	23	1	79	16.3043	15.625	12.2222	21.1111	9	7	10	5	8	3	8	7	9	9	8	8	51.2	160	20	29	38	67	1	38	38	76	1	67	76	53	4	12	13	11	18	5	13	12	8	12	32
133	18	0	12	6	8	17	0	43	27.2727	25	25	31.25	11	9	11	9	11	7	7	5	12	11	9	14	68	178.8	21.2703	33	40	73	1	28	33	61	1	61	73	70	1	16	18	18	19	2	7	16	6	16	38
134	23	0	15	12	17	19	1	63	22.3404	18.75	18.8889	29.1667	8	8	12	6	9	4	12	7	13	8	7	16	74.6	181.7	22.5959	24	36	60	1	25	32	57	1	49	68	34	3	12	5	9	12	7	9	9	1	11	21
135	18	0	23	16	21	18	1	78	13.0435	19.7917	8.88889	10	7	11	11	6	5	3	8	7	7	8	4	5	57.8	173.6	19.1791	16	25	41	0	23	30	53	1	39	55	25	0	5	4	10	9	3	7	5	0	4	9
136	18	1	4	3	3	6	0	16	17.7305	18.75	18.8889	15.625	8	9	11	6	10	3	13	6	9	8	6	8	67.3	160.3	26.1908	12	24	36	0	18	19	37	0	30	43	11	0	2	0	9	10	10	13	1	0	1	2
137	18	0	23	6	17	15	1	61	10.7143	6.66667	16.6667	8.33333	4	4	10	3	6	3	14	7	6	4	6	2	66	172.9	22.0777	22	30	52	1	26	16	42	0	48	46	45	11	5	9	14	14	8	8	11	14	14	39
138	18	1	16	3	13	6	0	38	18.3761	12.5	17.7778	31.25	7	4	12	5	7	3	18	3	13	8	0	2	37	151.8	16.0568	10	13	23	0	12	13	25	0	22	26	-9	2	0	1	5	2	19	16	0	0	0	0
139	18	0	14	15	11	14	1	54	20.5674	16.6667	17.7778	27.0833	8	9	7	8	10	3	11	7	13	9	8	12	62.5	167.8	22.1971	28	31	59	1	33	33	66	1	61	64	35	3	11	10	8	13	10	8	7	7	16	30
140	18	0	8	3	4	9	0	24	11.3475	15.625	4.44444	13.5417	10	4	10	7	5	3	8	3	11	7	5	6	62	179.5	19.2426	13	16	29	0	16	15	31	0	29	31	-13	0	0	0	3	3	19	19	1	0	1	2
141	18	0	12	9	15	18	1	54	29.078	30.2083	27.7778	29.1667	12	9	13	11	10	6	15	9	12	9	8	15	80.1	172.2	27.0126	30	28	58	1	29	30	59	1	59	58	47	8	9	9	13	16	8	8	5	2	10	17
142	18	0	12	10	14	18	1	54	26.9504	23.9583	25.5556	31.25	10	7	13	9	11	3	15	9	13	9	10	14	97	173	32.41	31	32	63	1	33	32	65	1	64	64	70	5	13	17	17	20	2	5	14	4	17	35
143	17	0	22	12	16	26	1	76	20.5674	17.7083	18.8889	25	9	8	10	6	11	4	11	6	13	11	5	11	48.5	173.2	16.1676	17	24	41	0	25	23	48	1	42	47	6	2	1	4	5	4	10	10	1	2	5	8
144	18	0	18	13	14	25	1	70	32.6241	34.375	41.1111	22.9167	15	10	13	11	15	10	20	7	9	6	10	13	51.3	169.2	17.9191	13	39	52	1	13	36	49	1	26	75	73	20	15	19	18	18	17	13	0	4	4	8
145	20	0	21	12	12	36	1	81	33.6879	29.1667	36.6667	35.4167	11	11	11	11	12	9	18	9	19	10	9	12	68	184	20.0851	32	31	63	1	28	25	53	1	60	56	53	9	14	10	13	16	9	13	11	7	9	27
146	18	0	6	3	10	16	0	35	14.1844	12.5	22.2222	8.33333	10	6	8	4	7	8	13	7	8	4	3	9	55.5	169	19.4321	13	31	44	1	22	29	51	1	35	60	11	1	0	3	4	5	2	6	7	2	1	10
147	18	0	19	12	12	24	1	67	19.5035	16.6667	17.7778	23.9583	8	8	8	8	8	6	10	7	13	10	7	9	68	167.5	24.237	20	30	50	1	20	30	50	1	40	60	19	5	4	5	5	5	5	5	6	6	6	18
148	18	0	14	7	8	16	0	45	25.5319	25	28.8889	22.9167	9	11	10	10	11	7	14	9	10	12	7	9	60.1	179.1	18.7363	20	29	49	1	23	27	50	1	43	56	30	6	8	9	8	8	9	8	7	11	10	28
149	18	0	16	13	12	24	1	65	34.7518	32.2917	37.7778	34.375	11	12	12	12	15	10	15	9	15	13	9	12	78.4	183.2	23.3596	10	14	24	0	23	15	38	0	33	29	-5	0	4	4	0	0	13	13	0	0	0	0
150	19	0	20	14	14	21	1	69	18.4397	20.8333	16.6667	17.7083	11	8	8	9	8	6	10	6	10	8	6	9	61.4	162.5	23.2521	32	22	54	1	21	29	50	1	53	51	38	10	8	10	10	10	10	10	6	6	6	18
151	19	0	9	6	9	10	0	34	18.0851	15.625	18.8889	19.7917	5	8	9	9	8	4	14	6	11	9	7	8	65.5	180.9	20.0154	14	28	42	1	22	23	45	1	36	51	5	0	3	0	3	4	5	8	1	0	2	3
152	18	0	8	8	9	14	0	39	19.1489	21.875	16.6667	18.75	8	10	12	7	8	5	13	4	9	8	6	11	48.8	168.8	17.1267	18	35	53	1	22	27	49	1	40	62	30	10	3	6	8	6	3	11	5	3	7	15
153	20	0	17	10	13	20	1	60	25.8865	30.2083	20	27.0833	12	9	13	11	9	5	13	6	11	10	7	14	56.5	170.5	19.4357	19	29	48	1	31	32	63	1	50	61	28	2	8	8	4	10	4	7	4	0	7	11
154	18	0	28	5	11	9	1	53	19.8582	19.7917	17.7778	21.875	13	9	9	4	10	6	10	5	11	12	4	10	54.2	167.4	19.3414	19	32	51	1	25	30	55	1	44	62	46	9	12	9	9	14	7	11	5	2	2	9
155	19	0	4	5	4	14	0	27	20.5674	17.7083	25.5556	18.75	13	4	12	4	7	6	19	6	13	4	9	8	70.5	176.1	22.7337	11	17	28	0	16	16	32	0	27	33	-6	0	1	0	8	0	15	14	0	0	3	3
156	18	0	11	3	20	14	0	48	4.60993	4.16667	3.33333	6.25	4	4	7	5	5	4	6	3	5	5	5	7	43.5	160.3	16.9286	14	31	45	1	24	33	57	1	38	64	13	0	2	6	3	4	2	4	3	0	7	10
157	18	0	22	3	9	12	0	46	21.1111	26.0417	22.619	14.4444	12	7	14	8	7	5	14	7	11	5	4	8	54.3	166.9	19.4934	28	34	62	1	33	35	68	1	61	69	20	2	5	4	5	7	3	6	7	1	15	23
158	18	0	14	12	16	9	0	51	20.8333	23.8095	20.2381	18.75	7	8	14	5	8	4	14	5	8	7	10	9	66.4	179.6	20.5852	13	13	26	0	26	27	53	1	39	40	24	3	9	4	12	5	9	14	5	4	9	18
159	18	0	28	3	15	18	1	64	15.6028	17.7083	10	18.75	11	9	7	6	8	3	9	4	8	9	11	6	47.3	167.8	16.7988	24	15	39	0	35	18	53	1	59	33	46	6	11	14	9	8	2	11	8	0	16	24
160	18	0	23	10	9	9	0	51	7.40741	4.16667	9.52381	8.88889	4	6	6	4	8	3	7	4	8	4	4	7	49.5	174.8	16.2003	30	19	49	1	31	17	48	1	61	36	25	0	7	8	6	17	13	15	7	3	8	18
161	18	1	22	7	7	13	0	49	22.8682	28.125	11.1111	30.5556	12	10	15	6	9	3	8	5	11	9	6	8	60.6	166.7	21.8073	13	11	24	0	21	11	32	0	34	22	12	1	5	5	7	10	16	17	5	2	2	9
162	18	1	18	12	13	20	1	63	18.0851	19.7917	13.3333	20.8333	11	8	11	5	8	4	9	6	10	8	8	10	46.6	161	17.9777	23	30	53	1	20	29	49	1	43	59	35	9	8	10	9	9	10	10	6	5	6	17
163	18	0	23	13	8	21	1	65	20	15.5556	17.8571	26.0417	7	5	13	4	10	5	9	5	13	11	6	11	70.2	166.8	25.2316	16	22	38	0	23	23	46	1	39	45	29	1	4	10	10	6	2	11	9	0	7	16
164	19	0	16	17	18	20	1	71	18.0851	18.75	16.6667	18.75	8	8	10	8	8	6	10	6	11	8	6	9	56.5	173.5	18.7694	14	32	46	1	18	34	52	1	32	66	18	4	4	6	6	4	6	8	6	7	8	21
165	18	1	24	9	7	7	0	47	15.6028	22.9167	13.3333	10.4167	8	10	14	6	7	4	10	6	10	6	6	4	58.2	163.3	21.8248	18	37	55	1	26	31	57	1	44	68	41	1	10	6	16	15	7	13	8	1	5	14
166	18	1	19	12	12	24	1	67	21.6312	31.25	13.3333	19.7917	12	12	12	10	7	5	10	5	11	7	6	11	43.4	155.2	18.018	19	26	45	1	32	18	50	1	51	44	21	0	6	8	7	9	9	14	11	0	7	18
167	18	0	20	13	14	20	1	67	20.7407	23.8095	18.8889	19.7917	6	9	11	8	8	6	12	6	10	8	7	10	59	168	20.9042	14	35	49	1	21	35	56	1	35	70	28	6	3	6	9	7	3	7	7	6	9	22
168	18	1	27	12	15	29	1	83	24.4681	19.7917	21.1111	32.2917	10	8	8	9	11	6	11	6	14	10	7	16	59.1	157.1	23.9461	26	33	59	1	30	30	60	1	56	63	39	6	7	12	11	8	5	9	14	7	15	36
169	18	1	10	4	5	8	0	27	28.3688	27.0833	32.2222	26.0417	11	9	13	9	11	8	14	11	14	11	11	5	57.1	164.1	21.2041	18	30	48	1	23	25	48	1	41	55	11	0	4	4	3	8	8	12	1	0	3	4
170	18	0	4	3	3	6	0	16	18.0851	25	15.5556	13.5417	8	10	14	8	8	3	13	5	10	8	7	4	49.6	166.4	17.9133	10	13	23	0	13	15	28	0	23	28	-4	0	0	1	1	4	10	9	0	0	1	1
171	18	1	19	13	16	21	1	69	23.0496	21.875	23.3333	23.9583	10	8	10	9	11	5	14	6	12	9	8	10	56.5	151.4	24.6489	23	39	62	1	32	37	69	1	55	76	52	7	7	13	14	11	0	4	4	6	5	15
172	18	0	19	9	13	12	1	53	8.86525	10.4167	5.55556	10.4167	9	4	9	4	5	3	9	3	5	9	6	6	66.7	170.6	22.9175	14	25	39	0	23	23	46	1	37	48	18	2	4	2	13	6	9	13	4	3	7	14
173	18	0	25	16	17	28	1	86	14.539	13.5417	10	19.7917	9	8	8	4	8	4	7	5	11	10	7	7	53.5	169	18.7318	16	29	45	1	33	25	58	1	49	54	18	1	5	6	6	6	6	12	6	1	7	14
174	18	1	19	12	13	24	1	68	29.7872	34.375	21.1111	33.3333	12	11	13	13	12	3	11	8	15	11	10	12	38	149.6	16.9793	22	35	57	1	23	32	55	1	45	67	47	9	11	9	13	14	9	12	3	2	9	14
175	18	0	4	3	3	6	0	16	13.8298	12.5	12.2222	16.6667	8	7	8	5	4	6	10	6	10	8	6	8	61.6	171.6	20.9193	12	13	25	0	11	11	22	0	23	24	-11	0	0	0	3	1	15	13	0	0	0	0
176	18	1	12	7	10	16	0	45	17.5214	20	15.1515	16.6667	10	8	9	6	8	5	4	4	10	8	4	4	47.8	152.8	20.473	23	29	52	1	25	29	54	1	48	58	36	6	8	9	10	14	11	11	7	5	7	19
177	18	1	19	4	9	11	0	43	21.2766	18.75	21.1111	23.9583	8	9	11	6	10	5	12	7	11	9	8	11	49.3	156.6	20.1031	19	37	56	1	20	25	45	1	39	62	19	1	4	2	7	11	6	11	4	1	4	9
178	18	0	9	4	7	8	0	28	16.3121	18.75	15.5556	14.5833	8	9	12	5	8	3	12	6	9	8	8	5	55	162.5	20.8284	14	23	37	0	20	23	43	0	34	46	0	2	2	3	3	4	14	18	5	4	3	12
179	18	0	14	3	4	6	0	27	17.0635	15.4762	14.4444	21.7949	9	6	5	7	8	3	11	6	8	7	6	9	74.4	166.9	26.7092	18	28	46	1	22	27	49	1	40	55	20	1	6	4	9	7	7	11	5	0	6	11
180	18	0	21	8	17	13	1	59	20.2128	17.7083	20	22.9167	7	6	11	9	10	3	12	8	10	8	9	11	82.5	172.5	27.7253	24	29	53	1	37	27	64	1	61	56	48	9	10	11	12	12	6	8	15	6	16	37
181	18	0	4	3	3	6	0	16	0	0	0	0	4	4	4	4	4	3	5	3	5	4	3	4	65.3	186.8	18.7137	11	17	28	0	21	17	38	0	32	34	9	0	4	1	6	9	11	17	0	0	1	1
182	18	0	12	9	9	18	0	48	29.4326	34.375	21.1111	32.2917	13	12	12	12	10	7	10	7	15	12	10	10	60.5	168.5	21.3086	26	35	61	1	28	34	62	1	54	69	46	8	9	10	12	11	4	8	12	10	15	37
183	18	1	14	3	6	8	0	31	22.3404	29.1667	16.6667	20.8333	10	13	13	8	7	4	12	7	9	10	8	9	43.2	159.6	16.9597	17	30	47	1	19	19	38	0	36	49	15	2	5	2	7	9	10	15	2	1	2	5
184	18	0	17	13	7	12	0	49	8.51064	12.5	8.88889	4.16667	5	4	13	6	4	3	10	6	6	4	3	7	49.6	165.7	18.0649	27	35	62	1	26	29	55	1	53	64	40	10	6	9	10	10	5	9	7	8	9	24
185	18	0	14	4	6	7	0	31	27.305	25	27.7778	29.1667	11	9	14	6	9	6	17	8	16	10	7	11	56.7	169	19.8522	15	30	45	1	23	26	49	1	38	56	16	0	7	1	8	6	6	14	3	1	4	8
186	18	1	10	9	3	6	0	28	7.0922	9.375	2.22222	9.375	9	5	6	5	4	3	6	4	9	5	5	6	50	161	19.2894	14	18	32	0	18	15	33	0	32	33	3	4	3	5	2	4	15	14	8	3	2	13
187	18	0	4	3	3	6	0	16	3.62319	11.1111	0	0	3	8	8	6	4	3	5	3	5	4	3	4	63.6	177.7	20.1411	10	11	21	0	11	14	25	0	21	25	-11	0	1	0	1	1	14	14	0	0	0	0
188	18	0	9	11	12	12	0	44	25.8865	27.0833	18.8889	31.25	12	9	14	7	9	4	13	6	12	12	12	10	71.4	179.9	22.0615	11	34	45	1	17	34	51	1	28	68	16	0	3	1	7	5	0	4	1	0	2	3
189	18	1	17	3	7	6	0	33	26.2963	22.9167	27.7778	28.5714	8	8	13	9	9	8	15	8	8	11	5	14	84.5	164.1	31.379	14	32	46	1	25	29	54	1	39	61	12	8	1	2	7	4	10	12	9	12	10	31
190	18	1	10	7	10	6	0	33	24.1135	28.125	23.3333	20.8333	11	10	13	9	8	6	15	7	10	10	8	8	53.2	161	20.5239	11	13	24	0	18	17	35	0	29	30	10	2	6	4	5	5	12	16	0	2	5	7
191	18	1	17	12	11	13	1	53	23.8636	27.7778	20.5128	22.9167	12	9	8	11	9	4	9	7	11	10	10	7	48	157	19.4734	25	31	56	1	35	29	64	1	60	60	36	0	14	10	7	17	12	13	7	4	9	20
192	18	1	9	7	6	10	0	32	25.1773	31.25	20	23.9583	10	12	16	8	10	3	13	7	13	8	7	11	43.5	153.8	18.3898	13	30	43	1	19	20	39	0	32	50	11	1	4	1	5	7	7	7	2	0	4	6
193	18	1	17	3	17	10	0	47	24.2754	26.6667	22.2222	23.9583	11	9	14	5	8	6	15	6	11	9	8	11	55.3	153.2	23.5618	20	28	48	1	26	31	57	1	46	59	23	3	6	6	6	7	5	9	3	1	5	9
194	18	1	4	3	3	6	0	16	21.9858	22.9167	23.3333	19.7917	6	10	14	8	8	6	16	6	12	9	6	8	57.7	163	21.717	11	28	39	0	14	30	44	0	25	58	20	3	5	2	4	12	6	7	4	5	6	15
195	19	0	21	14	8	12	1	55	31.9149	34.375	28.8889	32.2917	13	12	14	10	12	7	14	8	15	11	10	11	56	178	17.6745	14	30	44	1	20	28	48	1	34	58	19	0	6	1	4	11	3	8	2	1	2	5
196	18	1	10	5	11	9	0	35	30.8511	36.4583	22.2222	33.3333	14	14	14	9	12	3	13	7	14	10	12	12	57	152.2	24.6063	15	34	49	1	23	29	52	1	38	63	24	2	5	3	8	10	4	8	3	0	11	14
197	18	0	6	4	4	8	0	22	18.8406	19.7917	20.2381	16.6667	8	9	12	6	9	5	11	6	8	8	7	9	57	160	22.2656	17	23	40	0	19	25	44	0	36	48	3	1	3	0	4	6	11	15	3	1	3	7
198	18	0	12	13	19	22	1	66	19.8582	17.7083	13.3333	28.125	7	10	9	7	9	3	9	6	12	10	7	14	76.4	165.3	27.9607	24	30	54	1	32	28	60	1	56	58	56	11	10	15	13	14	7	13	3	2	8	13
199	18	1	25	4	6	12	0	47	16.3121	26.0417	4.44444	17.7083	11	14	8	8	4	3	7	5	6	9	8	10	52.5	162.5	19.8817	14	28	42	1	19	26	45	1	33	54	17	3	5	7	7	6	11	16	9	2	8	19
200	19	0	13	3	3	6	0	25	5.03876	11.1111	4.16667	0	6	4	11	4	2	3	6	4	5	4	3	4	67	181	20.4511	12	21	33	0	19	21	40	0	31	42	6	0	3	0	6	10	13	11	3	0	3	6
201	18	1	16	8	12	16	1	52	33.7398	33.3333	33.3333	34.375	4	13	16	6	12	1	18	5	15	13	10	11	54.7	168.8	19.1974	14	28	42	1	22	25	47	1	36	53	32	6	7	8	10	7	6	10	5	5	9	19
202	18	0	17	12	12	24	1	65	15.2482	20.8333	12.2222	12.5	6	10	12	8	7	8	7	4	8	8	6	6	70.5	171.5	23.9696	15	22	37	0	14	25	39	0	29	47	1	3	0	0	2	3	7	13	1	0	2	3
203	18	0	5	3	3	6	0	17	21.9858	18.75	23.3333	23.9583	8	8	10	8	8	6	15	7	10	8	9	12	64.2	178.6	20.1267	13	21	34	0	11	25	36	0	24	46	-7	1	3	0	5	1	17	19	0	0	1	1
204	18	1	4	3	3	8	0	18	8.15603	7.29167	11.1111	6.25	4	4	9	6	6	3	7	9	5	4	3	10	60	166	21.7738	18	35	53	1	20	30	50	1	38	65	30	4	6	9	6	14	9	8	3	0	3	6
205	18	1	13	3	13	10	0	39	13.4752	13.5417	15.5556	11.4583	7	4	11	7	7	3	13	6	8	4	7	8	52.4	163.8	19.5301	18	30	48	1	27	18	45	1	45	48	10	0	2	1	8	8	9	11	9	0	7	16
206	18	1	28	21	21	31	1	101	18.0851	28.125	17.7778	8.33333	12	12	12	7	10	5	9	7	6	8	4	6	53	159.9	20.729	17	37	54	1	28	34	62	1	45	71	40	4	8	11	13	6	2	2	15	11	14	40
207	18	1	17	8	12	18	1	55	29.1667	28.5714	30.9524	28.125	12	8	9	9	9	6	17	8	15	8	11	9	38.6	152.9	16.511	15	35	50	1	18	34	52	1	33	69	19	3	6	2	7	5	4	9	3	2	7	12
208	18	0	7	3	3	8	0	21	13.1206	15.625	0	22.9167	4	10	10	7	4	3	5	3	5	12	9	12	68.1	171.5	23.1536	14	15	29	0	19	19	38	0	33	34	-9	0	4	2	0	3	18	18	3	4	2	9
209	20	0	21	18	17	29	1	85	30.1418	34.375	27.7778	28.125	13	12	13	11	12	7	13	8	12	11	9	11	68	177.7	21.5345	34	40	74	1	35	32	67	1	69	72	37	3	9	8	8	13	4	5	14	8	12	34
210	18	1	12	7	10	12	0	41	22.3404	23.9583	23.3333	19.7917	11	10	10	8	10	6	13	7	10	9	6	10	54.8	161.8	20.9326	13	27	40	0	16	21	37	0	29	48	13	2	4	4	3	7	7	14	1	0	3	4
211	18	1	17	14	12	25	1	68	22.3404	26.0417	24.4444	16.6667	11	11	10	9	11	9	11	6	10	8	6	8	53	153.9	22.3768	22	31	53	1	22	20	42	0	44	51	7	1	3	1	4	3	5	7	4	2	3	9
212	18	1	8	3	3	6	0	20	25.4386	18.1818	23.6111	32.2222	3	6	12	2	3	3	15	8	11	14	9	10	40.3	147.2	18.599	18	37	55	1	23	32	55	1	41	69	46	6	9	10	14	12	5	11	9	3	10	22
213	18	0	23	9	6	11	0	49	20.7407	23.8095	14.4444	23.9583	5	11	12	6	5	3	13	7	9	7	10	13	83	178.5	26.0496	17	37	54	1	25	27	52	1	42	64	22	1	7	4	9	9	8	11	2	2	8	12
214	18	0	22	12	11	9	1	54	24.8062	13.8889	36.6667	21.875	0	6	10	6	16	8	15	9	11	8	8	10	70	179.9	21.629	14	32	46	1	21	31	52	1	35	63	22	0	5	6	10	4	3	9	5	3	6	14
215	18	0	8	6	5	7	0	26	22.093	25.5556	23.0769	17.7778	10	9	14	5	10	8	9	4	10	8	9	4	52.1	163.1	19.5853	11	24	35	0	22	26	48	1	33	50	16	2	6	5	11	6	14	15	3	0	3	6
216	18	0	16	20	20	24	1	80	28.0142	23.9583	25.5556	34.375	11	9	13	6	9	6	15	8	17	11	9	12	47.3	168.3	16.6991	25	32	57	1	28	28	56	1	53	60	51	0	10	11	19	13	2	9	12	5	13	30
217	18	1	8	4	10	9	0	31	21.8519	22.2222	16.6667	26.0417	10	7	8	10	9	3	9	7	13	8	9	11	48.6	160.2	18.937	14	24	38	0	21	24	45	1	35	48	27	3	6	12	10	8	12	11	4	1	8	13
218	18	1	12	9	9	16	0	46	22.695	23.9583	20	23.9583	9	9	12	9	8	6	12	7	13	8	8	10	50	161.3	19.2177	12	21	33	0	16	25	41	0	28	46	3	0	4	0	4	5	10	10	1	0	0	1
219	18	0	7	11	9	6	0	33	13.1206	15.625	7.77778	15.625	10	8	9	4	7	3	7	5	11	8	7	5	57.8	174	19.091	15	22	37	0	15	21	36	0	30	43	11	5	4	4	7	6	15	15	6	6	4	16
220	18	0	9	5	9	12	0	35	20.2128	20.8333	18.8889	20.8333	10	8	10	8	8	6	12	6	11	9	8	8	66	177	21.0667	11	29	40	0	21	23	44	0	32	52	17	5	3	4	7	7	9	13	1	0	2	3
221	18	1	22	9	12	17	1	60	20.5674	28.125	21.1111	12.5	14	11	8	10	12	3	11	8	12	6	4	6	57.5	156	23.6275	19	34	53	1	25	30	55	1	44	64	33	0	6	2	15	16	6	10	9	5	13	27
222	18	1	24	10	7	18	1	59	26.25	25	26.9231	27.2727	10	8	11	11	11	3	12	8	11	8	6	4	60	165.5	21.9056	20	31	51	1	24	23	47	1	44	54	31	12	6	5	9	8	9	13	10	11	6	27
223	18	0	21	13	13	18	1	65	19.1489	19.7917	18.8889	18.75	7	7	12	9	10	5	12	5	12	6	6	10	65	178	20.5151	13	28	41	0	23	30	53	1	36	58	23	4	2	3	10	11	7	7	9	6	10	25
224	18	1	15	4	3	8	0	30	13.8298	19.7917	12.2222	9.375	6	9	13	7	7	3	11	5	8	6	6	5	44.5	151.9	19.2861	13	13	26	0	16	15	31	0	29	28	-7	1	3	2	6	1	20	18	0	1	1	2
225	18	0	11	10	6	14	0	41	23.8636	24.4444	28.2051	19.7917	12	8	4	13	4	7	16	8	12	8	8	7	82.3	181.3	25.0383	16	20	36	0	22	15	37	0	38	35	4	1	3	3	5	8	16	15	4	3	2	9
226	18	0	12	8	13	20	1	53	26.2411	32.2917	22.2222	23.9583	12	12	13	10	8	6	14	7	11	9	8	11	53.4	161.4	20.4991	17	27	44	1	25	26	51	1	42	53	33	6	7	6	10	11	7	13	1	0	2	3
227	18	1	11	3	3	6	0	23	14.1844	14.5833	12.2222	15.625	6	6	12	6	8	3	11	4	12	5	8	6	54.9	163	20.6632	20	24	44	1	28	25	53	1	48	49	22	0	8	1	10	15	12	17	5	0	4	9
228	18	1	8	6	6	10	0	30	18.4397	20.8333	16.6667	17.7083	8	8	11	9	8	6	10	6	11	8	6	8	64.1	161.8	24.485	31	27	58	1	16	26	42	0	47	53	-3	0	2	0	1	3	9	9	1	0	1	2
229	18	1	14	5	7	6	0	32	21.6312	18.75	20	26.0417	7	9	10	8	11	6	11	5	10	9	10	12	57.7	168.3	20.3708	20	24	44	1	29	23	52	1	49	47	25	3	7	4	10	12	11	16	2	0	2	4
230	18	1	5	3	3	9	0	20	18.6992	27.381	11.9048	16.6667	11	13	7	6	7	9	5	3	4	11	5	6	50	150	22.2222	17	26	43	1	24	21	45	1	41	47	35	9	11	7	8	11	11	16	9	2	11	22
231	18	1	15	9	9	8	0	41	23.0496	22.9167	23.3333	22.9167	9	9	13	7	8	6	13	9	14	8	8	8	60.9	167.8	21.6288	17	28	45	1	29	27	56	1	46	55	27	1	6	7	9	9	5	8	6	0	3	9
232	18	1	22	5	10	7	0	44	12.0155	14.1026	4.44444	17.7778	7	6	6	5	6	3	5	5	10	8	6	7	47.4	151.5	20.6516	12	18	30	0	20	23	43	0	32	41	11	0	5	5	4	7	10	15	4	0	8	12
233	18	0	5	6	4	6	0	21	13.1206	20.8333	6.66667	11.4583	8	12	11	5	6	3	8	4	8	5	8	6	67	180	20.679	10	17	27	0	10	16	26	0	20	33	-14	0	0	0	0	0	14	14	0	0	0	0
234	18	2	27	14	14	26	1	81	5.67376	13.5417	1.11111	2.08333	6	5	10	8	5	3	5	3	5	5	3	5	47	150.6	20.7228	18	30	48	1	26	26	52	1	44	56	22	1	5	5	7	8	4	5	6	4	6	16
235	17	1	11	4	4	6	0	25	12.6812	21.1111	11.1111	6.25	9	11	11	3	6	3	12	4	8	5	3	6	52	156	21.3675	13	32	45	1	18	26	44	0	31	58	16	0	1	2	8	11	6	9	5	0	1	6
236	18	1	6	5	3	6	0	20	19.9275	29.1667	20.2381	10.4167	12	10	15	7	8	3	16	4	9	5	7	5	46.5	155.1	19.3299	14	32	46	1	23	21	44	0	37	53	10	3	3	4	3	3	6	8	2	4	3	9
237	18	1	10	3	12	6	0	31	21.6312	26.0417	18.8889	19.7917	11	9	14	7	11	3	13	5	10	6	6	13	55.4	162	21.1096	27	28	55	1	30	28	58	1	57	56	41	9	10	10	4	15	7	11	6	4	11	21
238	18	1	16	6	12	20	1	54	18.8034	20.5128	16.6667	18.75	7	8	6	8	6	3	5	6	10	9	6	9	56.5	160.7	21.8785	15	24	39	0	17	26	43	0	32	50	13	4	2	3	6	6	8	9	3	4	3	10
239	18	0	12	4	8	8	0	32	2.83688	5.20833	2.22222	1.04167	9	4	4	4	4	3	7	3	5	5	3	4	68	172.6	22.8259	17	27	44	1	26	28	54	1	43	55	39	5	11	11	11	13	12	15	8	4	14	26
240	18	1	21	14	19	28	1	82	27.6596	27.0833	30	26.0417	11	10	11	10	10	7	16	9	10	12	8	11	56.5	166	20.5037	14	37	51	1	21	26	47	1	35	63	9	1	2	1	4	4	3	7	2	4	4	10
241	18	0	17	3	5	14	0	39	15.6028	18.75	18.8889	9.375	9	7	12	6	13	5	11	3	9	4	6	6	71.4	169.4	24.8812	20	20	40	0	25	17	42	0	45	37	23	0	5	3	10	14	9	10	4	3	7	14
242	18	1	8	6	6	12	0	32	19.1489	18.75	15.5556	22.9167	7	7	11	9	9	3	10	7	11	11	6	10	43	153	18.369	21	31	52	1	30	26	56	1	51	57	43	8	8	10	12	13	8	13	8	8	9	25
243	19	1	22	14	12	30	1	78	8.86525	9.375	5.55556	11.4583	7	6	7	5	8	3	6	3	9	6	5	7	56	164.4	20.7197	18	22	40	0	23	21	44	0	41	43	35	9	8	7	14	11	14	15	4	4	5	13
244	18	1	4	3	14	12	0	33	10.2837	15.625	7.77778	7.29167	7	8	9	7	4	3	11	4	7	6	4	6	54.3	158.5	21.6143	12	28	40	0	19	27	46	1	31	55	11	1	4	4	2	4	4	10	2	0	10	12
245	18	0	8	8	6	9	0	31	21.2766	26.0417	21.1111	16.6667	12	8	13	8	10	4	14	6	10	8	6	8	58	173.3	19.3122	12	30	42	1	15	31	46	1	27	61	4	0	2	1	3	4	6	8	1	0	1	2
246	18	0	16	12	12	24	1	64	12.4113	27.0833	4.44444	5.20833	14	10	12	6	8	3	5	3	5	4	3	9	58.9	175.9	19.0363	15	10	25	0	22	12	34	0	37	22	-14	0	0	0	0	1	15	15	0	0	0	0
247	22	0	12	5	9	18	0	44	26.5957	30.2083	23.3333	26.0417	12	9	11	13	9	7	12	8	12	9	11	9	57	170	19.7232	23	25	48	1	20	32	52	1	43	57	21	6	2	5	5	9	6	6	7	8	7	22
248	18	0	12	6	7	12	0	37	20.5674	25	20	16.6667	15	8	9	8	9	6	10	8	10	8	6	8	75	160	29.2969	16	29	45	1	22	24	46	1	38	53	18	0	5	3	7	11	8	12	3	0	5	8
249	18	1	10	7	14	16	0	47	18.0851	16.6667	17.7778	19.7917	7	8	11	6	7	6	13	5	12	7	5	11	57.5	161.2	22.1278	25	32	57	1	31	24	55	1	56	56	44	9	8	7	10	14	4	7	10	10	12	32
250	18	1	23	3	16	18	1	60	25.8865	31.25	20	26.0417	13	9	14	10	9	6	11	7	11	11	9	10	63.1	163.3	23.6623	23	15	38	0	33	16	49	1	56	31	37	3	8	9	14	16	13	15	5	0	1	6
251	18	1	9	5	6	22	0	42	23.4043	26.0417	13.3333	30.2083	13	10	11	7	8	3	10	6	13	11	9	12	36.8	141.5	18.3796	27	31	58	1	37	30	67	1	64	61	53	10	10	15	12	10	4	7	18	13	18	49
252	18	1	12	3	4	11	0	30	12.4113	17.7083	8.88889	10.4167	11	6	10	6	6	3	8	6	8	4	6	8	55.5	166.6	19.996	15	32	47	1	21	29	50	1	36	61	17	4	1	5	6	7	6	8	6	3	7	16
253	18	0	10	7	15	21	1	53	22.695	25	17.7778	25	10	9	11	10	11	3	11	6	13	10	8	9	82.5	172.5	27.7253	19	30	49	1	28	28	56	1	47	58	23	2	5	8	4	9	5	6	7	2	11	20
254	18	1	5	3	3	7	0	18	15.6028	11.4583	15.5556	19.7917	7	7	8	5	9	3	12	5	9	7	8	11	53.9	159.9	21.081	10	30	40	0	16	19	35	0	26	49	1	0	0	0	3	3	5	8	1	0	0	1
255	18	1	5	3	6	7	0	21	19.8582	22.9167	21.1111	15.625	12	8	12	6	7	5	13	9	12	6	6	7	50.2	160.5	19.4874	17	30	47	1	19	28	47	1	36	58	19	5	3	4	6	9	8	10	6	9	7	22
256	18	1	17	11	4	7	0	39	19.5035	22.9167	16.6667	18.75	10	9	11	8	9	3	12	6	13	6	8	7	50	154	21.0828	14	34	48	1	24	26	50	1	38	60	28	3	12	1	13	12	13	15	6	2	14	22
257	18	1	15	20	14	13	1	62	30.1418	32.2917	23.3333	34.375	12	13	15	7	10	3	14	9	17	11	9	12	57.3	157.5	23.099	24	39	63	1	31	29	60	1	55	68	50	12	11	8	12	13	6	11	12	6	13	31
258	18	1	7	7	7	6	0	27	17.4797	19.2308	11.1111	20.8333	5	8	8	7	8	3	8	1	11	8	8	9	46.2	157.2	18.6955	14	21	35	0	21	20	41	0	35	41	12	6	4	4	2	4	8	9	2	4	4	10
259	18	0	24	16	21	21	1	82	18.8889	22.9167	18.8889	14.2857	11	10	11	6	9	4	12	7	11	6	5	4	59	174	19.4874	24	32	56	1	35	31	66	1	59	63	50	8	10	13	11	11	3	10	9	8	15	32
260	18	1	10	4	6	8	0	28	19.1489	17.7083	17.7778	21.875	8	9	10	6	6	6	12	7	12	7	6	12	48.3	158.5	19.226	13	20	33	0	16	20	36	0	29	40	7	1	3	2	4	4	7	11	3	1	4	8
261	18	1	7	4	7	6	0	24	23.7589	22.9167	26.6667	21.875	10	9	10	9	10	5	16	8	10	8	8	11	46	157.2	18.6146	25	20	45	1	37	21	58	1	62	41	22	0	10	4	7	13	12	17	3	0	10	13
262	18	1	19	6	7	6	0	38	21.2766	26.0417	20	17.7083	11	10	14	6	11	4	10	8	12	7	7	7	49.5	159.7	19.4087	12	28	40	0	22	25	47	1	34	53	13	4	2	4	3	5	5	15	6	1	6	13
263	18	1	20	17	17	16	1	70	18.6508	16.6667	15.3846	23.3333	7	6	10	5	2	5	12	6	10	8	8	10	64	151	28.0689	18	26	44	1	25	26	51	1	43	52	28	8	8	7	7	9	11	11	9	6	12	27
264	18	0	14	4	10	8	0	36	26.087	30	22.2222	26.0417	12	8	14	8	10	4	15	6	9	10	8	14	68.6	177.2	21.8472	23	29	52	1	27	25	52	1	50	54	40	9	8	11	9	13	10	8	10	9	6	25
265	18	0	15	10	10	12	0	47	28.3688	29.1667	26.6667	29.1667	11	11	13	9	12	7	15	5	14	10	8	12	54	169.2	18.8622	21	28	49	1	27	26	53	1	48	54	18	1	4	5	7	8	7	9	4	2	3	9
266	18	0	10	9	9	15	0	43	25.8865	28.125	23.3333	26.0417	8	13	14	8	8	5	17	6	10	11	7	13	57	172.5	19.1556	15	28	43	1	18	27	45	1	33	55	2	0	1	0	2	5	6	6	1	0	2	3
267	18	1	12	6	6	12	0	36	10.9929	15.625	8.88889	8.33333	8	8	7	8	8	4	7	4	10	7	3	4	50	160	19.5312	16	16	32	0	19	18	37	0	35	34	0	1	3	0	3	5	12	12	1	1	2	4
268	18	1	10	4	8	8	0	30	24.4681	28.125	20	25	11	9	13	10	10	3	13	7	11	8	8	13	56.4	164.5	20.8424	20	24	44	1	24	26	50	1	44	50	12	0	7	2	7	8	12	11	3	0	11	14
269	18	2	24	10	16	13	1	63	23.4043	19.7917	22.2222	28.125	8	9	12	6	10	5	13	7	12	9	9	13	45.9	172.5	15.4253	31	30	61	1	36	30	66	1	67	60	39	3	13	14	5	9	5	17	5	6	14	25
270	18	1	19	6	6	12	0	43	9.21986	12.5	6.66667	8.33333	8	8	7	5	5	3	7	6	8	4	6	6	41.5	153.4	17.6359	13	19	32	0	24	24	48	1	37	43	10	3	3	2	7	5	10	10	3	1	1	5
271	18	1	16	8	14	11	0	49	18.4783	23.3333	22.2222	10.4167	8	8	10	10	10	5	14	6	8	6	7	5	51.5	165.9	18.7118	16	28	44	1	21	29	50	1	37	57	4	1	0	3	4	5	9	9	3	3	5	11
272	18	1	18	6	11	9	0	44	17.0455	16.6667	13.3333	20.8333	8	6	8	4	7	3	11	6	12	8	9	7	54.6	160	21.3281	16	27	43	1	29	19	48	1	45	46	32	8	8	5	10	11	10	12	6	3	9	18
273	18	0	22	3	5	10	0	40	9.57447	11.4583	5.55556	11.4583	8	5	8	6	5	3	9	3	11	4	4	8	46.8	165.7	17.0452	12	22	34	0	28	23	51	1	40	45	17	1	8	1	11	14	18	18	5	4	4	13
274	18	1	18	10	13	18	1	59	16.6667	16.6667	16.6667	16.6667	6	8	9	5	9	6	9	6	8	7	6	9	67.4	162.3	25.5872	22	36	58	1	27	26	53	1	49	62	45	0	10	13	15	13	6	8	10	1	13	24
275	18	1	22	14	11	15	1	62	21.9858	20.8333	18.8889	26.0417	9	9	12	6	9	5	11	7	12	11	8	10	56.4	150.2	25	16	33	49	1	31	30	61	1	47	63	39	2	10	7	14	12	6	13	9	3	13	25
276	18	1	10	8	7	15	0	40	25	26.0417	25	23.9583	9	10	16	6	11	5	15	4	14	10	8	7	79	164.5	29.1941	19	19	38	0	27	23	50	1	46	42	19	0	8	5	7	12	13	13	2	0	3	5
277	19	1	10	6	4	7	0	27	25	17.7083	29.7619	28.125	9	7	13	4	7	7	16	9	15	12	9	7	54.8	159.8	21.4599	16	31	47	1	27	21	48	1	43	52	10	5	5	5	6	8	19	18	2	0	5	7
278	18	0	19	12	15	24	1	70	15.2482	11.4583	15.5556	18.75	6	8	9	4	7	4	12	6	9	6	6	13	55	165	20.202	18	40	58	1	23	26	49	1	41	66	22	0	3	0	9	10	0	0	3	2	13	18
279	18	1	16	3	7	6	0	32	23.4043	27.0833	25.5556	17.7083	11	11	12	8	11	7	13	7	11	7	7	8	56.5	159.7	22.1533	16	22	38	0	12	26	38	0	28	48	-1	1	3	1	3	4	13	15	1	1	2	4
280	21	0	11	7	16	10	0	44	31.2057	30.2083	35.5556	28.125	10	8	12	15	9	12	16	10	16	12	6	9	57	169.5	19.8397	27	31	58	1	33	29	62	1	60	60	34	5	7	8	7	12	5	8	16	10	13	39
281	18	1	10	5	5	6	0	26	18.4783	21.1111	13.3333	20.8333	8	9	11	6	8	3	11	5	11	8	6	11	51.5	158	20.6297	14	28	42	1	19	25	44	0	33	53	4	1	1	0	5	6	9	11	1	1	2	4
282	18	2	19	7	15	33	1	74	9.52381	7.69231	9.52381	11.1111	4	6	4	5	5	5	9	3	9	6	5	5	77.6	153.4	32.977	17	32	49	1	22	25	47	1	39	57	14	2	2	5	7	4	6	10	6	1	9	16
283	18	0	16	12	15	19	1	62	27.305	27.0833	21.1111	33.3333	11	9	13	9	9	4	13	8	16	11	10	11	50	167.6	17.8001	19	33	52	1	28	32	60	1	47	65	46	4	10	11	13	15	7	15	7	5	12	24
284	18	1	15	11	17	20	1	63	23.4043	26.0417	22.2222	21.875	10	9	14	8	7	4	16	8	12	8	6	11	48	160.8	18.5639	18	33	51	1	24	34	58	1	42	67	25	2	11	4	4	9	5	7	7	1	8	16
285	18	1	10	7	7	16	0	40	15.9574	14.5833	15.5556	17.7083	6	7	9	8	7	4	11	7	10	8	7	8	55	162	20.9572	16	34	50	1	23	28	51	1	39	62	18	6	7	6	5	8	14	15	2	8	6	16
286	18	1	4	3	3	6	0	16	20.2128	23.9583	13.3333	22.9167	10	10	12	7	8	3	10	6	12	9	8	9	48	162	18.2899	12	23	35	0	20	21	41	0	32	44	-1	0	1	0	2	5	9	10	1	0	1	2
287	26	0	18	10	12	20	1	60	22.695	20.8333	21.1111	26.0417	10	9	9	8	9	7	12	6	12	11	8	10	88.7	177.6	28.1214	15	21	36	0	27	23	50	1	42	44	14	4	3	4	5	5	7	10	8	6	6	20
288	23	0	28	15	17	24	1	84	9.57447	2.08333	4.44444	21.875	4	4	6	4	4	3	8	4	12	6	7	12	110.5	162.3	41.9494	15	23	38	0	26	27	53	1	41	50	18	4	5	5	5	7	8	7	2	0	4	6
289	25	0	21	15	15	27	1	78	27.305	25	26.6667	30.2083	10	10	10	10	10	7	14	8	15	11	9	10	60.2	178.2	18.9575	28	30	58	1	27	29	56	1	55	59	42	11	8	9	12	9	7	9	10	11	10	31
290	22	0	18	4	12	10	0	44	28.75	31.8182	29.7619	25.5556	12	9	8	3	11	8	14	6	12	7	7	12	62.5	171.2	21.3242	17	26	43	1	21	27	48	1	38	53	23	3	8	4	9	11	12	13	5	3	7	15
291	21	0	17	14	15	25	1	71	20.5674	21.875	17.7778	21.875	12	8	8	9	6	6	12	7	10	9	8	10	50.2	170.1	17.3498	23	27	50	1	26	23	49	1	49	50	33	12	6	9	5	10	9	13	11	8	10	29
292	21	0	18	4	5	18	0	45	22.3404	18.75	22.2222	26.0417	9	8	9	8	10	7	12	6	13	9	8	11	49.5	170	17.128	20	37	57	1	24	28	52	1	44	65	33	6	10	8	9	11	11	13	9	7	8	24
293	22	0	21	14	15	29	1	79	15.942	15.5556	15.5556	16.6667	7	8	8	6	8	5	10	6	10	8	6	8	68.7	184	20.2918	22	26	48	1	25	25	50	1	47	51	28	7	6	6	8	8	7	9	10	11	8	29
294	21	0	7	12	21	14	1	54	32.9545	27.0833	29.7619	42.8571	10	10	14	8	12	5	15	7	19	12	11	8	90.5	170.5	31.1315	22	32	54	1	31	34	65	1	53	66	24	0	8	8	5	9	6	9	11	0	10	21
295	19	0	14	7	12	8	0	41	21.6312	21.875	20	22.9167	11	8	10	8	11	4	12	6	11	9	7	11	58	168.3	20.4767	23	29	52	1	30	26	56	1	53	55	28	0	9	7	7	10	5	13	7	0	12	19
296	20	0	24	12	13	26	1	75	18.7943	18.75	16.6667	20.8333	10	8	8	8	9	5	13	3	14	5	6	11	62.4	180.1	19.2379	14	25	39	0	26	27	53	1	40	52	28	2	7	4	11	7	3	11	6	0	8	14
297	22	0	24	15	20	14	1	73	25	27.0833	22.2222	25.5556	12	6	12	12	12	5	11	7	12	7	3	16	62	165.5	22.6358	21	26	47	1	33	27	60	1	54	53	42	4	9	15	13	11	10	14	9	3	12	24
298	19	0	24	18	18	36	1	96	13.8298	13.5417	13.3333	14.5833	8	7	6	8	8	6	8	5	8	8	6	8	56	165	20.5693	19	25	44	1	21	26	47	1	40	51	25	15	3	6	4	5	8	8	5	1	12	18
299	18	0	11	3	7	31	1	52	20.2128	21.875	22.2222	16.6667	11	6	12	8	8	3	16	8	8	10	6	8	58	165	21.3039	25	36	61	1	19	33	52	1	44	69	44	7	11	11	16	15	16	16	11	9	5	25
300	18	0	15	4	16	8	0	43	25.2033	21.2121	29.7619	23.9583	7	3	6	9	8	6	16	9	11	9	7	12	46.2	161	17.8234	13	34	47	1	23	28	51	1	36	62	48	6	12	9	12	15	6	11	4	5	3	12
301	18	0	11	3	3	7	0	24	20.5674	26.0417	17.7778	17.7083	10	9	14	8	5	5	14	7	9	8	8	8	64	163	24.0882	12	21	33	0	16	18	34	0	28	39	1	2	3	3	3	7	17	20	3	1	4	8
302	18	0	7	3	3	6	0	19	2.83688	8.33333	0	0	8	4	8	4	4	3	5	3	5	4	3	4	63.9	178.9	19.9655	11	10	21	0	11	10	21	0	22	20	-9	0	0	0	7	4	20	19	1	0	0	1
303	18	0	18	3	4	7	0	32	18.4397	19.7917	13.3333	21.875	11	7	11	6	8	4	9	6	11	8	6	12	98.8	175.8	31.9683	14	21	35	0	14	23	37	0	28	44	14	5	6	1	5	6	9	6	1	3	6	10
304	18	0	10	5	10	8	0	33	6.02837	5.20833	4.44444	8.33333	5	4	6	6	5	3	7	4	9	4	5	6	47.5	166.5	17.1343	13	16	29	0	19	19	38	0	32	35	-5	0	2	1	2	4	14	14	1	0	1	2
305	18	0	19	13	11	31	1	74	23.1884	22.9167	13.3333	33.3333	10	10	12	6	9	3	11	4	17	10	9	9	60.6	168	21.4711	27	29	56	1	32	29	61	1	59	58	48	6	9	13	12	17	9	15	6	5	10	21
306	18	1	22	12	12	20	1	66	0.35461	1.04167	0	0	5	4	4	4	4	3	5	3	5	4	3	4	35.6	148.1	16.2308	21	33	54	1	33	34	67	1	54	67	27	0	4	7	9	9	2	6	16	2	5	23
307	18	1	6	3	4	8	0	21	17.0213	16.6667	20	14.5833	9	8	9	6	8	5	13	7	7	5	5	13	59.8	160.4	23.243	13	30	43	1	16	32	48	1	29	62	26	11	4	3	10	5	7	6	3	9	7	19
308	18	0	21	14	17	21	1	73	15.8537	17.8571	17.8571	11.5385	7	7	11	4	5	3	13	8	7	6	5	4	52.5	170	18.1661	32	32	64	1	29	31	60	1	61	63	58	4	10	12	17	18	3	7	16	6	14	36
309	18	0	19	7	11	12	0	49	19.5035	22.9167	14.4444	20.8333	11	10	10	7	10	3	10	5	10	8	8	10	58	168	20.5499	13	24	37	0	23	25	48	1	36	49	26	3	8	9	7	8	9	10	0	0	0	0
310	19	0	22	11	16	28	1	77	19.2029	15.625	14.4444	27.7778	5	4	12	10	4	6	12	6	10	8	9	13	87.6	170.6	30.0986	28	25	53	1	40	30	70	1	68	55	62	2	15	18	16	20	9	10	12	3	17	32
311	18	0	7	4	9	7	0	27	14.539	9.375	17.7778	16.6667	5	4	8	8	9	6	10	6	10	8	6	8	85	173.4	28.2697	13	21	34	0	16	22	38	0	29	43	18	5	4	4	8	9	12	11	1	0	2	3
312	18	0	20	8	8	19	1	55	32.9787	34.375	37.7778	27.0833	13	12	14	10	13	11	17	8	14	8	9	11	66.3	175.6	21.5013	20	35	55	1	20	31	51	1	40	66	10	1	2	1	5	5	4	3	7	2	7	16
313	18	0	12	11	17	16	1	56	7.44681	8.33333	6.66667	7.29167	7	5	6	6	7	3	6	5	7	6	4	6	59.8	179.8	18.4979	21	26	47	1	26	30	56	1	47	56	24	2	5	5	8	10	6	7	5	0	5	10
314	18	1	6	3	13	11	0	33	19.6296	18.8889	24.4444	15.5556	10	9	8	5	9	6	14	8	9	8	5	7	54.5	162.8	20.5631	18	17	35	0	26	23	49	1	44	40	10	1	5	4	4	9	13	13	6	5	10	21
315	18	0	9	4	11	8	0	32	23.4043	26.0417	18.8889	25	13	9	12	7	8	3	14	7	13	7	10	10	61.5	169.8	21.3304	15	21	36	0	18	20	38	0	33	41	11	0	2	2	5	9	7	11	4	0	2	6
316	18	1	9	3	19	13	0	44	19.3182	16.6667	16.6667	24.4444	3	7	11	7	7	4	14	5	7	7	9	14	42.3	164.4	15.6508	18	35	53	1	20	31	51	1	38	66	56	0	10	16	14	16	0	9	5	0	7	12
317	18	0	19	5	7	8	0	39	17.0213	17.7083	12.2222	20.8333	10	7	9	7	6	3	11	6	12	9	8	7	51.7	175.2	16.8431	14	19	33	0	23	21	44	0	37	40	-4	2	1	0	3	10	20	19	2	2	3	7
318	18	1	14	7	11	7	0	39	31.25	30	28.5714	36.3636	12	11	13	6	10	3	16	9	12	14	3	6	53.2	157.2	21.5281	14	25	39	0	27	25	52	1	41	50	24	1	7	9	5	14	12	11	4	1	4	9
319	20	0	20	6	10	8	0	44	15.812	15.3846	16.6667	15.4762	9	6	4	6	8	6	6	4	10	7	2	8	50.6	168.3	17.8641	22	38	60	1	19	29	48	1	41	67	23	0	2	13	15	6	13	5	7	4	7	18
320	18	1	16	4	6	8	0	34	10.2837	9.375	8.88889	12.5	8	5	6	6	8	3	9	3	11	5	3	9	43.5	156.3	17.8062	18	25	43	1	30	24	54	1	48	49	33	6	10	4	14	12	13	15	7	12	8	27
321	18	0	17	3	4	6	0	30	16.3121	21.875	8.88889	17.7083	9	8	13	7	4	3	11	5	8	8	7	10	59.4	165	21.8182	14	26	40	0	25	29	54	1	39	55	23	2	4	7	7	11	8	10	6	2	5	13
322	18	0	13	9	12	15	0	49	23.4043	23.9583	18.8889	27.0833	10	9	12	8	10	3	13	6	13	9	6	14	40.5	162.2	15.3941	22	34	56	1	26	35	61	1	48	69	34	2	6	9	5	13	1	6	6	2	7	15
323	18	0	19	13	15	19	1	66	20.7407	26.1905	13.3333	22.9167	10	9	12	5	10	4	10	3	11	8	9	10	53	163.5	19.8262	15	30	45	1	24	27	51	1	39	57	27	7	6	2	8	12	8	12	5	5	5	15
324	18	1	8	3	3	7	0	21	15.6028	21.875	7.77778	16.6667	12	9	10	6	7	3	7	5	12	5	7	8	42.5	157	17.2421	13	14	27	0	33	22	55	1	46	36	18	1	7	8	7	7	12	16	2	0	3	5
325	18	0	19	13	15	27	1	74	25.8865	22.9167	23.3333	31.25	11	9	11	7	12	6	11	7	12	12	9	13	57.2	167.8	20.3148	25	31	56	1	28	29	57	1	53	60	40	7	8	10	9	11	5	6	9	9	12	30
326	18	0	11	6	8	14	0	39	20.3252	19.4444	16.6667	24.4444	4	7	11	4	6	3	13	6	12	9	8	8	66.6	175.8	21.5495	15	31	46	1	21	25	46	1	36	56	14	4	4	2	5	5	6	6	4	5	6	15
327	27	1	10	15	21	30	1	76	26.2411	21.875	25.5556	31.25	10	9	14	4	10	3	19	6	13	7	10	16	44.6	165.3	16.3226	38	35	73	1	38	34	72	1	76	69	66	11	14	15	12	17	3	6	18	14	14	46
328	19	0	21	9	11	8	0	49	25	31.1111	20	23.9583	12	7	14	10	9	3	13	8	10	8	9	12	78	170	26.9896	14	24	38	0	21	22	43	0	35	46	13	0	5	4	7	8	11	11	1	0	5	6
329	18	0	21	8	19	9	1	57	25.8333	24.2424	18.8889	34.5238	9	8	5	5	9	4	13	6	9	8	10	16	75.6	168.5	26.627	35	37	72	1	34	28	62	1	69	65	63	5	15	12	19	19	7	13	15	9	18	42
330	18	0	25	17	19	20	1	81	22.3404	16.6667	22.2222	28.125	9	5	12	6	13	3	12	7	13	7	9	14	54	167.8	19.1783	21	36	57	1	37	31	68	1	58	67	58	5	9	16	17	17	6	12	13	7	14	34
331	18	0	22	13	18	28	1	81	28.0142	28.125	23.3333	32.2917	12	11	11	9	10	6	11	9	15	8	11	13	56	166	20.3223	10	25	35	0	28	28	56	1	38	53	14	4	2	1	7	2	2	6	0	2	8	10
332	18	1	6	3	4	6	0	19	26.9504	25	22.2222	33.3333	11	8	12	9	9	5	14	7	15	8	9	16	50.7	163.5	18.9659	11	24	35	0	19	25	44	0	30	49	2	0	0	1	1	4	4	6	3	0	6	9
333	18	0	13	5	13	10	0	41	22.093	27.381	16.6667	21.875	10	11	8	8	11	3	7	5	11	6	8	12	95.3	170.3	32.8597	13	14	27	0	23	19	42	0	36	33	21	2	7	6	6	10	10	10	4	0	5	9
334	18	1	22	7	3	6	0	38	25.7246	28.8889	21.1111	27.0833	11	11	14	5	10	4	13	7	14	8	10	10	40.3	164.3	14.929	17	29	46	1	22	32	54	1	39	61	11	2	3	1	9	9	13	15	4	2	7	13
335	18	0	14	9	11	22	1	56	24.1135	27.0833	22.2222	22.9167	11	11	11	9	9	6	13	7	13	9	6	10	63.5	165.2	23.2677	12	24	36	0	21	33	54	1	33	57	17	0	2	2	9	10	6	9	4	3	4	11
336	19	0	11	3	7	12	0	33	20	19.7917	11.1111	29.7619	9	11	9	6	6	4	10	5	11	11	6	11	60.4	173.2	20.1345	17	17	34	0	34	24	58	1	51	41	31	1	6	13	6	15	10	12	10	1	13	24
337	18	0	22	6	11	11	0	50	20	13.3333	17.7778	28.8889	8	3	10	6	7	4	14	6	9	6	11	15	47	166.4	16.9743	17	24	41	0	26	22	48	1	43	46	10	0	2	4	5	7	8	8	3	3	10	16
338	20	1	15	8	9	17	0	49	13.4752	13.5417	12.2222	14.5833	9	6	8	6	11	3	9	3	5	6	7	12	55.6	166	20.1771	16	37	53	1	33	26	59	1	49	63	31	7	8	7	9	8	8	9	8	4	8	20
339	21	0	20	13	18	31	1	82	15.9574	14.5833	16.6667	16.6667	7	7	8	8	8	6	10	6	10	8	6	8	73.5	184	21.7096	23	18	41	0	30	21	51	1	53	39	22	5	4	7	6	8	8	9	0	0	2	2
340	18	0	14	6	15	19	1	54	26.5873	23.8095	23.6111	31.25	8	10	9	7	10	4	9	6	15	9	9	13	64.5	167.3	23.0445	19	30	49	1	24	26	50	1	43	56	44	2	13	10	14	10	5	6	8	5	10	23
341	18	1	9	4	12	7	0	32	13.1206	12.5	20	7.29167	8	5	9	6	8	5	14	6	8	4	3	8	48.5	159	19.1844	11	20	31	0	18	22	40	0	29	42	-4	0	1	2	8	2	17	7	3	0	5	8
342	18	0	11	3	3	6	0	23	15.942	16.6667	14.4444	16.6667	9	7	12	4	10	3	9	6	11	5	4	10	56.5	170.2	19.5043	11	16	27	0	12	12	24	0	23	28	-17	0	1	0	0	0	18	14	0	0	0	0
343	18	1	25	6	9	7	0	47	18.4397	10.4167	17.7778	27.0833	7	4	9	6	9	3	13	6	14	8	7	13	60.1	162	22.9005	11	25	36	0	15	30	45	1	26	55	16	0	3	0	12	6	5	4	0	0	3	3
344	18	0	23	15	17	29	1	84	21.7391	18.8889	30	16.6667	9	8	8	7	11	8	17	6	9	9	6	8	57	173	19.0451	21	30	51	1	20	30	50	1	41	60	24	6	5	7	6	5	5	6	8	9	9	26
345	18	1	18	12	15	25	1	70	18.7943	20.8333	16.6667	18.75	9	9	10	8	8	6	10	6	10	8	6	10	38.8	155.7	16.005	13	33	46	1	29	30	59	1	42	63	54	14	11	14	11	14	10	14	6	6	6	18
346	18	0	19	17	20	29	1	85	22.3404	23.9583	18.8889	23.9583	13	10	7	9	9	6	10	7	12	10	7	10	64.8	176	20.9194	26	22	48	1	28	20	48	1	54	42	29	5	7	6	10	9	8	9	7	6	11	24
347	18	0	10	3	11	6	0	30	14.539	16.6667	7.77778	18.75	4	8	12	8	8	3	8	3	10	4	7	13	55.3	166.4	19.9719	14	25	39	0	17	25	42	0	31	50	12	0	4	0	7	6	5	13	2	0	0	2
348	18	0	17	6	8	12	0	43	28.0142	28.125	33.3333	22.9167	12	11	15	5	11	7	20	7	11	8	7	12	55	173.4	18.2921	11	33	44	1	20	30	50	1	31	63	32	9	7	9	8	8	9	11	7	6	7	20
349	18	1	24	19	13	20	1	76	19.1489	18.75	16.6667	21.875	10	5	13	6	10	3	13	4	15	6	6	10	44.5	149.5	19.9103	32	36	68	1	31	33	64	1	63	69	58	0	16	10	14	20	2	10	10	3	16	29
350	18	0	26	15	14	6	1	61	11.7021	17.7083	15.5556	2.08333	12	6	9	6	8	7	9	5	7	4	3	4	88.3	181.1	26.923	17	16	33	0	33	12	45	1	50	28	22	3	5	9	8	9	12	14	5	4	3	12
351	18	0	23	8	12	25	1	68	16.3121	15.625	13.3333	19.7917	5	6	14	6	5	3	12	7	8	8	6	13	56.5	169.8	19.5963	15	23	38	0	17	20	37	0	32	43	10	2	3	2	9	7	13	9	1	2	4	7
352	18	0	4	3	8	6	0	21	14.9123	15.1515	12.2222	18.0556	3	7	8	3	7	3	13	3	5	4	3	13	56	165.5	20.4452	10	10	20	0	10	13	23	0	20	23	-10	0	0	0	4	2	16	12	0	0	0	0
353	18	0	8	6	11	6	0	31	23.4043	25	21.1111	23.9583	13	7	13	7	6	7	15	6	11	7	8	13	67.5	187.6	19.1795	15	26	41	0	29	25	54	1	44	51	32	0	8	10	10	13	9	10	3	1	9	13
354	18	1	19	15	14	15	1	63	26.2411	28.125	22.2222	28.125	10	9	14	10	9	5	14	7	13	8	8	14	56.4	159	22.3092	16	27	43	1	26	29	55	1	42	56	47	7	12	11	11	13	7	12	11	7	12	30
355	18	0	24	15	8	24	1	71	24.1135	21.875	22.2222	28.125	8	10	13	6	9	3	16	7	11	9	10	13	52.5	165	19.2837	25	30	55	1	26	27	53	1	51	57	49	2	11	13	12	15	4	13	12	2	12	26
356	20	0	9	8	15	14	0	46	15.9574	12.5	16.6667	18.75	7	5	11	5	5	3	14	8	14	5	3	12	85	192	23.0577	25	35	60	1	31	22	53	1	56	57	16	3	5	5	4	6	7	10	6	3	7	16
357	18	0	9	3	9	6	0	27	6.38298	9.375	3.33333	6.25	7	6	7	5	4	3	8	3	7	4	5	6	68.2	165	25.0505	14	13	27	0	22	16	38	0	36	29	16	8	3	1	5	11	12	15	4	4	5	13
358	18	0	15	15	13	10	1	53	16.6667	14.5833	14.4444	20.8333	7	7	9	7	9	4	10	5	8	8	6	14	62.5	162.5	23.6686	14	15	29	0	26	23	49	1	40	38	30	2	10	6	14	8	10	13	7	3	5	15
[truncated: 3 more columns]
